# Supplementary material for: Screening for consistency and contamination within and between bottles of 29 herbal supplements
Source: PubMed Central journal article supplement (PMC8610273; doi:10.1371/journal.pone.0260463), 2021-11-23
Supplement: pone.0260463.s001.pdf [file pone.0260463.s001.pdf]

**S1 Table. P-values of the analysis of herbal supplements from two or more suppliers.** P-values are based on ANOVA with an  $\alpha$  level of 0.05.

| Supplement              | Suppliers | Water Extraction |          |           | Methanolic Extraction |          |           |
|-------------------------|-----------|------------------|----------|-----------|-----------------------|----------|-----------|
|                         |           | Antioxidant      | Phenolic | Flavonoid | Antioxidant           | Phenolic | Flavonoid |
| Astragalus              | 2         | <0.001           | 0.158    | 0.128     | 0.231                 | <0.001   | 0.002     |
| Echinacea               | 2         | <0.001           | <0.001   | <0.001    | <0.001                | 0.567    | <0.001    |
| Echinacea<br>Goldenseal | 2         | <0.001           | <0.001   | 0.026     | <0.001                | <0.001   | <0.001    |
| Ginger Root             | 2         | 0.001            | NS       | <0.001    | <0.001                | <0.001   | <0.001    |
| Ginseng                 | 2         | <0.001           | <0.001   | 0.002     | 0.005                 | <0.001   | <0.001    |
| Rhodiola                | 2         | <0.001           | 0.004    | <0.001    | <0.001                | <0.001   | <0.001    |
| St. John's<br>Wort      | 3         | 0.26             | <0.001   | <0.001    | <0.001                | <0.001   | <0.001    |
| Turmeric                | 3         | <0.001           | <0.001   | <0.001    | <0.001                | <0.001   | <0.001    |
| Valerian<br>Root        | 3         | <0.001           | <0.001   | 0.036     | <0.001                | <0.001   | <0.001    |
