# Supplementary material for: Screening for consistency and contamination within and between bottles of 29 herbal supplements
Source: PubMed Central journal article supplement (PMC8610273; doi:10.1371/journal.pone.0260463), 2021-11-23
Supplement: pone.0260463.s002.pdf [file pone.0260463.s002.pdf]

**S2 Table. P-values of the analysis of bottles within a supplier for supplement.** P-values are based on ANOVA with an  $\alpha$  level of 0.05.

| Supplier         | Supplement                 | Water Extraction |        |        | Methanol Extraction |        |        |
|------------------|----------------------------|------------------|--------|--------|---------------------|--------|--------|
|                  |                            | A*               | P      | F      | A                   | P      | F      |
| Nature's Way     | Aloe                       | 0.013            | 0.367  | 0.728  | 0.001               | 0.295  | 0.088  |
| Nature's Way     | Astragalus                 | 0.002            | 0.221  | 0.083  | <0.001              | 0.009  | <0.001 |
| NOW              | Astragalus                 | <0.001           | 0.01   | 0.152  | <0.001              | <0.001 | 0.173  |
| NOW              | Biotin                     | <0.001           | 0.441  | 0.017  | <0.001              | <0.001 | <0.001 |
| Nature's Way     | Cranberry                  | 0.343            | <0.001 | 0.777  | <0.001              | 0.007  | <0.001 |
| Spring Valley    | Echinacea                  | <0.001           | 0.065  | <0.001 | 0.65                | <0.001 | <0.001 |
| Sundown Naturals | Echinacea                  | <0.001           | <0.001 | <0.001 | 0.02                | 0.454  | 0.028  |
| Nature's Way     | Echinacea<br>Goldenseal    | 0.878            | <0.001 | 0.098  | <0.001              | <0.001 | 0.603  |
| Spring Valley    | Echinacea<br>Goldenseal    | 0.001            | 0.686  | 0.081  | <0.001              | <0.001 | 0.046  |
| NOW              | Ginger                     | 0.003            | 0.251  | 0.086  | <0.001              | 0.488  | 0.002  |
| Spring Valley    | Ginger                     | 0.596            | 0.248  | 0.109  | 0.071               | 0.006  | 0.017  |
| Sundown Naturals | Ginseng<br>Xtra            | <0.001           | <0.001 | 0.001  | <0.001              | <0.001 | <0.001 |
| Spring Valley    | Korean<br>Panax<br>Ginseng | <0.001           | <0.001 | <0.001 | <0.001              | <0.001 | 0.001  |
| Nature's Way     | Red<br>Raspberry<br>Leaf   | <0.001           | <0.001 | 0.071  | <0.001              | 0.393  | <0.001 |
| Nature's Way     | Reishi                     | 0.537            | <0.001 | 0.106  | <0.001              | 0.385  | 0.005  |
| Nature's Way     | Rhodiola                   | 0.836            | 0.011  | 0.156  | 0.002               | 0.004  | 0.025  |
| NOW              | Rhodiola                   | 0.001            | 0.039  | <0.001 | <0.001              | <0.001 | <0.001 |
| Nature's Way     | Silent Night               | <0.001           | <0.001 | <0.001 | 0.172               | <0.001 | <0.001 |
| Nature's Way     | St. John's<br>Wort         | <0.001           | 0.66   | 0.347  | <0.001              | 0.541  | 0.373  |

|                  |                 |        |        |        |        |        |        |
|------------------|-----------------|--------|--------|--------|--------|--------|--------|
| Spring Valley    | St. John's Wort | <0.001 | 0.375  | 0.813  | <0.001 | 0.034  | <0.001 |
| Sundown Naturals | St. John's Wort | <0.001 | 0.005  | <0.001 | <0.001 | 0.002  | 0.003  |
| Sundown Naturals | Stress formula  | <0.001 | <0.001 | 0.202  | 0.0034 | 0.053  | <0.001 |
| Nature's Way     | Turmeric        | 0.009  | 0.75   | 1.00   | 0.034  | 0.521  | 0.015  |
| Spring Valley    | Turmeric        | 0.103  | 0.463  | 0.001  | <0.001 | <0.001 | <0.001 |
| Sundown Naturals | Turmeric        | 0.288  | 0.001  | 0.005  | 0.001  | 0.76   | 0.30   |
| Nature's Way     | Valerian Root   | <0.001 | 0.001  | 0.03   | 0.032  | 0.321  | 0.111  |
| Spring Valley    | Valerian Root   | 0.522  | <0.001 | <0.001 | <0.001 | 0.006  | <0.001 |
| Sundown Naturals | Valerian Root   | <0.001 | 0.078  | 0.039  | 0.076  | 0.01   | 0.502  |
| Nature's Way     | Yarrow          | 0.008  | 0.743  | 0.301  | 0.005  | 0.847  | <0.001 |
