# Supplementary material for: Screening for consistency and contamination within and between bottles of 29 herbal supplements
Source: PubMed Central journal article supplement (PMC8610273; doi:10.1371/journal.pone.0260463), 2021-11-23
Supplement: pone.0260463.s003.pdf [file pone.0260463.s003.pdf]

**S3 Table. Range of coefficient of variations (CV) from 58 bottles of over the counter herbal**

**supplements.** Antioxidant capacity, phenolic concentrations, and flavonoid concentrations were measured from both hot water and methanolic extractions of 10 pills from each of two bottles per supplement per supplier. Results of the Rank Runs test are also included with p-value of < 0.05 . indicating non-randomness of distribution among the results.

| Supplement              | Suppliers                       | Water Extraction |             |             | Methanolic Extraction |              |             |
|-------------------------|---------------------------------|------------------|-------------|-------------|-----------------------|--------------|-------------|
|                         |                                 | Antioxidant      | Phenolic    | Flavonoid   | Antioxidant           | Phenolic     | Flavonoid   |
| Aloe                    | 1                               | 6.29-34.27       | 4.23-31.93  | 2.67-55.40  | 9.87-11.03            | 21.01-22.60  | 13.85-18.89 |
| Astragalus              | 2                               | 9.34-48.62       | 13.39-38.60 | 7.23-122.55 | 6.88-66.72            | 7.85-20.67   | 9.24-44.39  |
| Biotin                  | 1                               | 22.23-89.13      | 18.81-38.71 | 0-120       | 4.13-161.93           | 25.24-30.10  | 0-61.70     |
| Cranberry               | 1                               | 9.79-44.42       | 8.39-22.15  | 10.65-68.28 | 14.22-20.64           | 26.90-39.01  | 34.59-43.47 |
| Echinacea               | 2                               | 7.89-59.95       | 14.16-33.17 | 8.21-25.39  | 6.49-19.41            | 15.99-187.57 | 8.90-61.54  |
| Echinacea<br>Goldenseal | 2                               | 9.07-48.99       | 9.59-33.33  | 9.27-34.89  | 2.53-20.71            | 12.89-47.92  | 5.59-109.15 |
| Ginger Root             | 2                               | 8.89-68.47       | 13.08-40.34 | 9.05-15.49  | 3.08-27.77            | 7.44-33.48   | 6.07- 300   |
| Ginseng                 | 2                               | 14.36-21.23      | 26.78-39.37 | 0-9.05      | 22.53-27.77           | 19.56-24.74  | 13.50-300   |
| Raspberry               | 1                               | 15.12-19.44      | 5.26-6.80   | 4.18-8.49   | 4.81-5.46             | 11.82-23.30  | 4.43-5.95   |
| Reishi                  | 1                               | 9.08-66.15       | 15.65-26.32 | 3.33-65.56  | 4.10-49.90            | 21.29-37.46  | 16.58-85.03 |
| Rhodiola                | 2                               | 14.92-28.32      | 11.11-61.57 | 8.67-30.61  | 18.20-76.74           | 14.49-38.45  | 14.84-38.66 |
| Silent Night            | 1                               | 10.86-23.26      | 6.76-23.57  | 12.69-30.14 | 10.54-49.61           | 6.99-17.10   | 9.37-53.23  |
| St. John's<br>Wort      | 3                               | 6.10-29.28       | 9.14-36.18  | 11.15-26.44 | 5.17-33.89            | 9.00-22.51   | 8.03-14.67  |
| Stress<br>Formula       | 1                               | 13.37-18.67      | 14.29-17.95 | 10.36-17.95 | 2.81-9.91             | 21.63-84.20  | 8.70-19.89  |
| Turmeric                | 3                               | 9.81-81.06       | 18.38-40.59 | 0-71.04     | 9.99-28.72            | 13.10-37.41  | 8.85-34.31  |
| Valerian<br>Root        | 3                               | 3.45-256.21      | 7.56-31.90  | 10.20-39.06 | 5.23-36.01            | 16.68-75.11  | 12.90-54.16 |
| Yarrow                  | 1                               | 24.06-34.58      | 38.81-39.45 | 24.53-28.12 | 5.09-12.22            | 21.86-23.18  | 7.82-21.63  |
|                         | Rank Runs<br>Test (p-<br>value) | 0.114            | 0.114       | 0.993       | 0.993                 | 0.008        | 0.002       |
