# Supplementary material for: Screening for consistency and contamination within and between bottles of 29 herbal supplements
Source: PubMed Central journal article supplement (PMC8610273; doi:10.1371/journal.pone.0260463), 2021-11-23
Supplement: pone.0260463.s004.pdf [file pone.0260463.s004.pdf]

**S4 Table. P-value from a 1 tailed t-test.** T-tests indicated a change in antioxidant capacity, phenolic and flavonoid concentration of -25% from the original test.

| Supplier         | Supplement              | Bottle | Water Extractions |        |        | Methanol Extractions |        |        |
|------------------|-------------------------|--------|-------------------|--------|--------|----------------------|--------|--------|
|                  |                         |        | A                 | P      | F      | A                    | P      | F      |
| Spring Valley    | Echinacea               | 1      | 0.995             | <0.001 | 0.992  | 0.151                | 0.987  | 1.00   |
| Spring Valley    | Echinacea               | 2      | <0.001            | 0.919  | 0.008  | 0.534                | .987   | 0.992  |
| Sundown Naturals | Echinacea               | 1      | 0.989             | 0.993  | <0.001 | <0.001               | 0.912  | 0.839  |
| Sundown Naturals | Echinacea               | 2      | <0.001            | 0.916  | <0.001 | 0.021                | 0.84   | 0.207  |
| Nature's Way     | Echinacea<br>Goldenseal | 1      | <0.001            | 0.993  | <0.001 | <0.001               | <0.001 | 1.00   |
| Nature's Way     | Echinacea<br>Goldenseal | 2      | 0.001             | 0.601  | <0.001 | <0.001               | 0.81   | 1.00   |
| Spring Valley    | Echinacea<br>Goldenseal | 1      | 0.26              | 0.892  | <0.001 | <0.001               | 0.002  | 1.00   |
| Spring Valley    | Echinacea<br>Goldenseal | 2      | 0.999             | 0.882  | <0.001 | 0.002                | 0.996  | 0.648  |
| Spring Valley    | Turmeric                | 1      | 0.508             | 0.903  | <0.001 | <0.001               | 1.00   | 0.003  |
| Spring Valley    | Turmeric                | 2      | 0.003             | 0.896  | <0.001 | <0.001               | 0.296  | <0.001 |
| Sundown Naturals | Turmeric                | 1      | <0.001            | 0.73   | <0.001 | <0.001               | 0.006  | <0.001 |
| Sundown Naturals | Turmeric                | 2      | <0.001            | 0.003  | <0.001 | <0.001               | 0.94   | 0.001  |
| Nature's Way     | Valerian                | 1      | <0.001            | 0.972  | <0.001 | <0.001               | 0.998  | 1.00   |
| Nature's Way     | Valerian                | 2      | <0.001            | 0.992  | 0.002  | <0.001               | 0.999  | 0.855  |
| Spring Valley    | Valerian                | 1      | 1.00              | 0.956  | <0.001 | <0.001               | 0.998  | 0.078  |
| Spring Valley    | Valerian                | 2      | 0.023             | 0.348  | 0.019  | <0.001               | 0.998  | 0.006  |
| Sundown Naturals | Valerian                | 1      | <0.001            | 0.474  | <0.001 | <0.001               | 0.419  | 0.938  |
| Sundown Naturals | Valerian                | 2      | 0.005             | 0.707  | <0.001 | <0.001               | 0.066  | 0.938  |
