# Supplementary material for: Screening for consistency and contamination within and between bottles of 29 herbal supplements
Source: PubMed Central journal article supplement (PMC8610273; doi:10.1371/journal.pone.0260463), 2021-11-23
Supplement: pone.0260463.s007.pdf [file pone.0260463.s007.pdf]

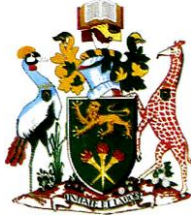

**UNIVERSITY OF NAIROBI  
COLLEGE OF AGRICULTURE AND VETERINARY SCIENCES  
DEPARTMENT OF FOOD SCIENCE, NUTRITION AND TECHNOLOGY  
P.O. BOX 29053-00625, KANGEMI, NAIROBI**

---

TEL: 630172, 631353/50/48- EXTENSION: 27093; E-mail: [ckunyanga@uonbi.ac.ke](mailto:ckunyanga@uonbi.ac.ke)

7<sup>th</sup> January, 2020

**REF: ACADEMIC EDITORS COMMENTS FOR MANUSCRIPT PONE-D-20-06630R2**

**Title: Screening for consistency and contamination within and between bottles of 29 herbal supplements.**

The manuscript has been thoroughly revised based on the reviewer's comments. The authors have adhered to the journal guidelines in preparation and submission of the revised manuscript. All the relevant documentation to support the manuscript including ethic consideration clearance have been provided by the authors.

The manuscript can now be considered for publication as submitted.

Yours Sincerely,

A handwritten signature in purple ink, consisting of a large, stylized 'C' followed by a horizontal line and a small flourish.

**Dr. Catherine Kunyanga (PhD)  
Department of Food Science, Nutrition & Technology**
